# Supplementary material for: Impact of Impure Gas on CO2 Capture from Flue Gas Using Carbon Nanotubes: A Molecular Simulation Study
Source: MDPI journal article supplement (doi:10.3390/molecules27051627), 2022-03-01
Supplement: s1 [file s1]

*Supplementary File*

# Impact of impurity gas on CO<sub>2</sub> capture from flue gas using carbon nanotubes: A molecular simulation study

Yiru Su<sup>a,c</sup>, Siyao Liu<sup>a,\*</sup> and Xuechao Gao<sup>b,\*</sup>

a) Key laboratory of low-grade Energy Utilization Technologies and Systems, Ministry of Education, School of Energy and Power Engineering, Chongqing University, Chongqing 400044, China

b) State Key Laboratory of Materials-Oriented Chemical Engineering, College of Chemical Engineering, Nanjing Tech University, No. 30 Puzhu Road (S), Nanjing 211816, PR China

c) State Key Laboratory of Pollution Control and Resource Reuse, School of the Environment, Nanjing University, Nanjing 210023, China

### 1. Effect of single impurity on the adsorption of CO<sub>2</sub>/N<sub>2</sub> mixtures in lager CNTs

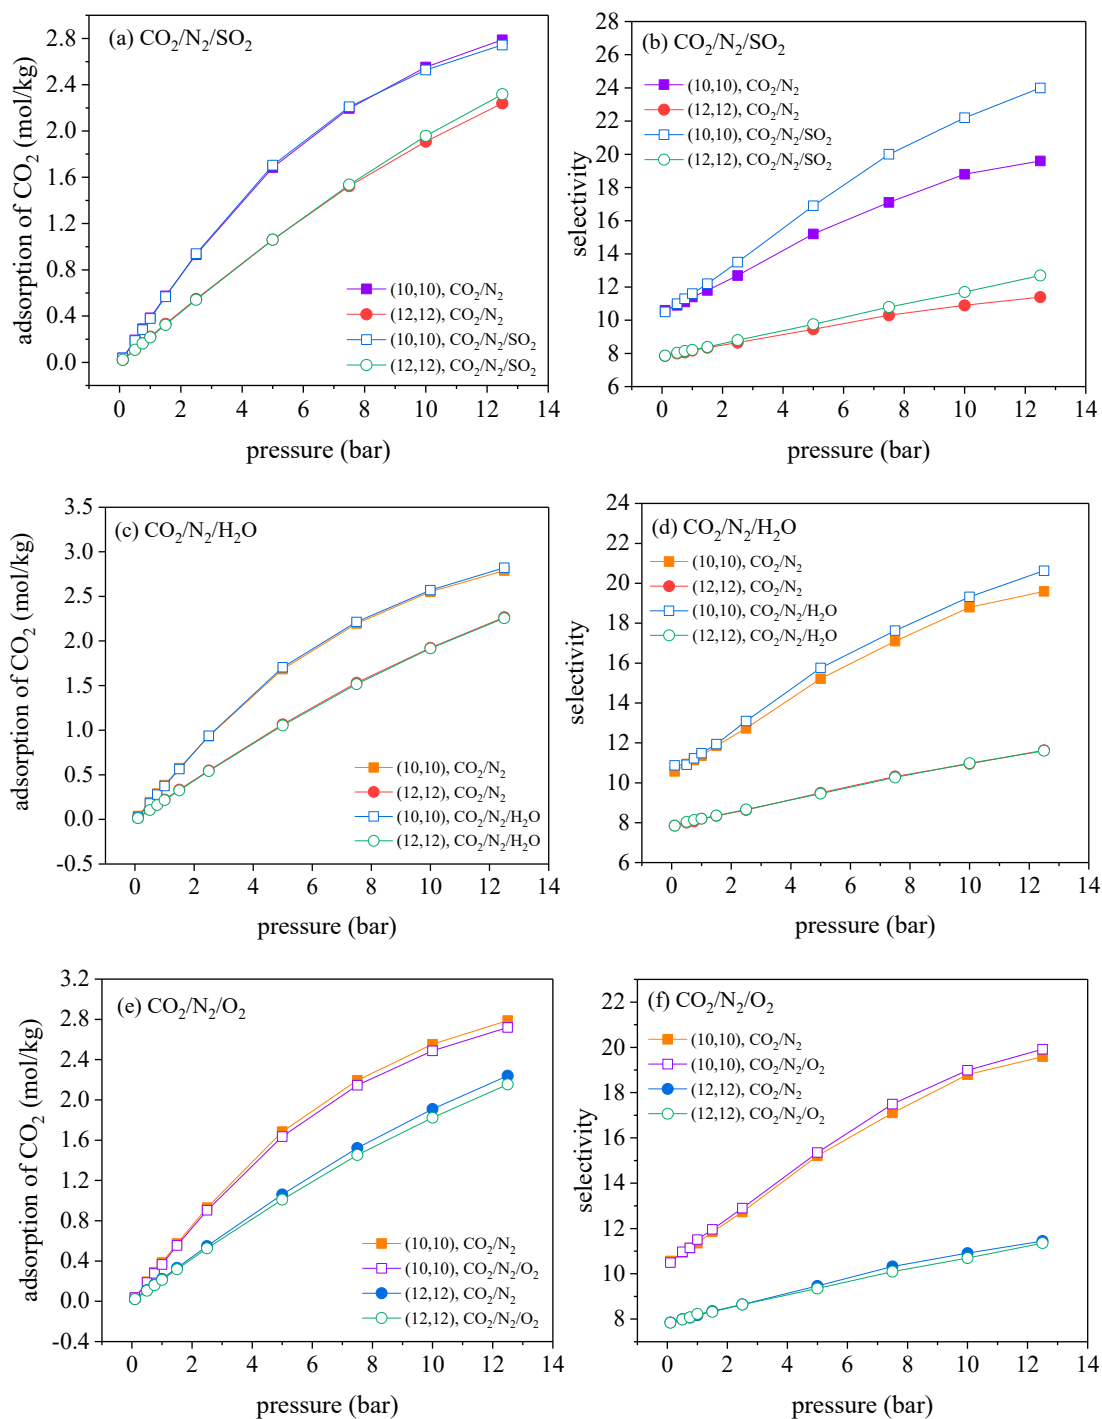

**Figure S1.** Adsorption isotherms for CO<sub>2</sub> in the presence of impurities, (a) SO<sub>2</sub>, (c) H<sub>2</sub>O, and (e) O<sub>2</sub>, and the corresponding CO<sub>2</sub>/N<sub>2</sub> selectivity (b, d and f), in the (10, 10) and (12, 12) CNTs.

### 2. Isotherm curves of single impurity in ternary mixtures

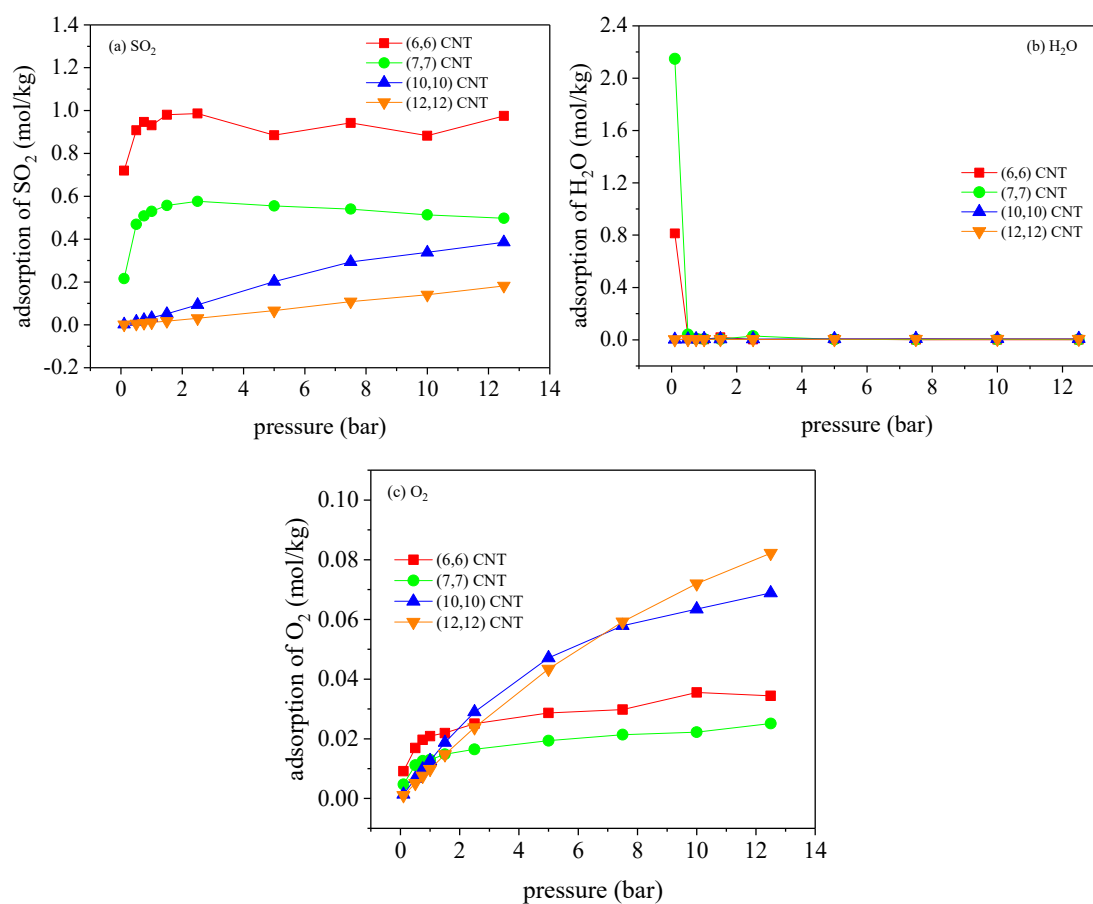

**Figure S2.** Isotherm curves with pressure for (a) SO<sub>2</sub> in CO<sub>2</sub>/N<sub>2</sub>/SO<sub>2</sub>, (b) H<sub>2</sub>O in CO<sub>2</sub>/N<sub>2</sub>/H<sub>2</sub>O, and (c) O<sub>2</sub> in CO<sub>2</sub>/N<sub>2</sub>/O<sub>2</sub>, in (6, 6), (7, 7), (10, 10) and (12, 12) CNTs at temperature of 300 K.

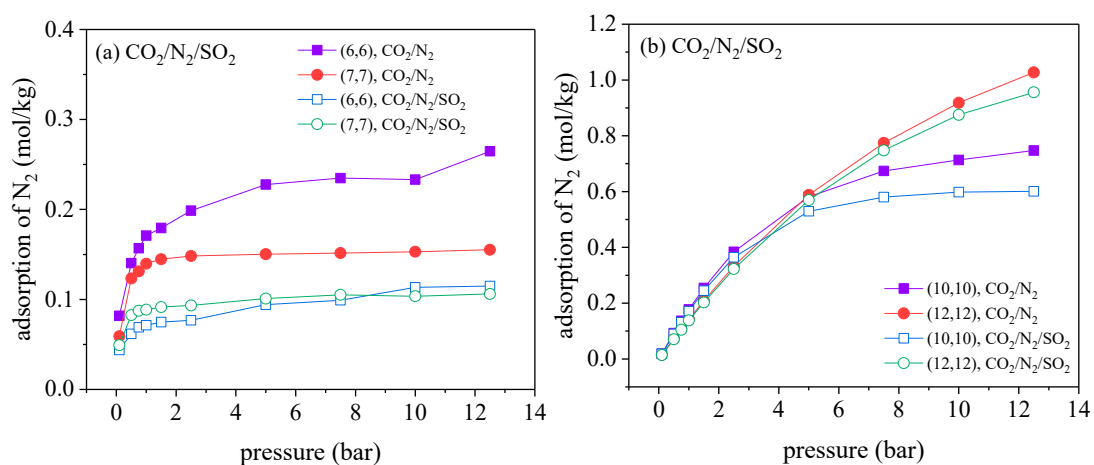

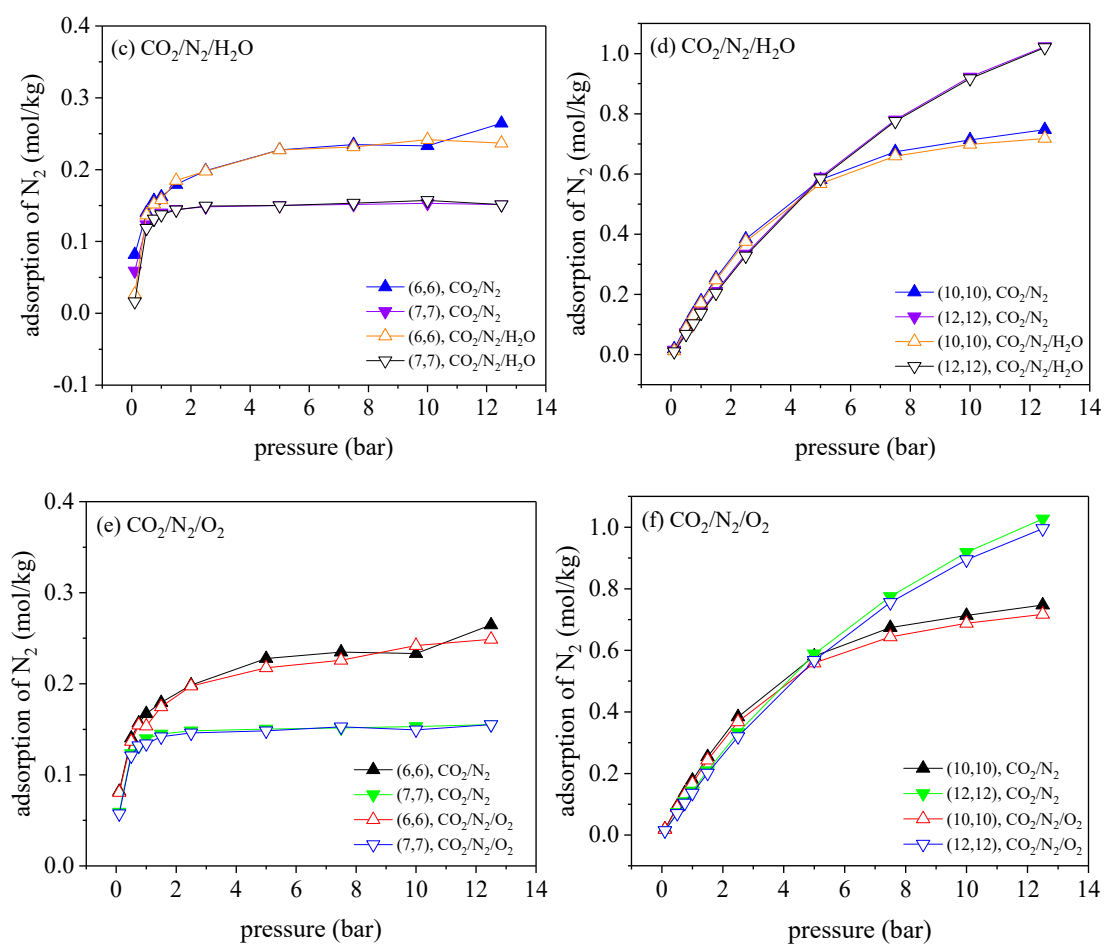

**Figure S3.** The adsorption of  $N_2$  in the presence of impurities which are (a, b)  $SO_2$ , (c, d)  $H_2O$  and (e, f)  $O_2$ . The left side is these mixtures in the (6, 6) and (7, 7) CNTs, and the right side is that in (10, 10) and (12, 12) CNTs.

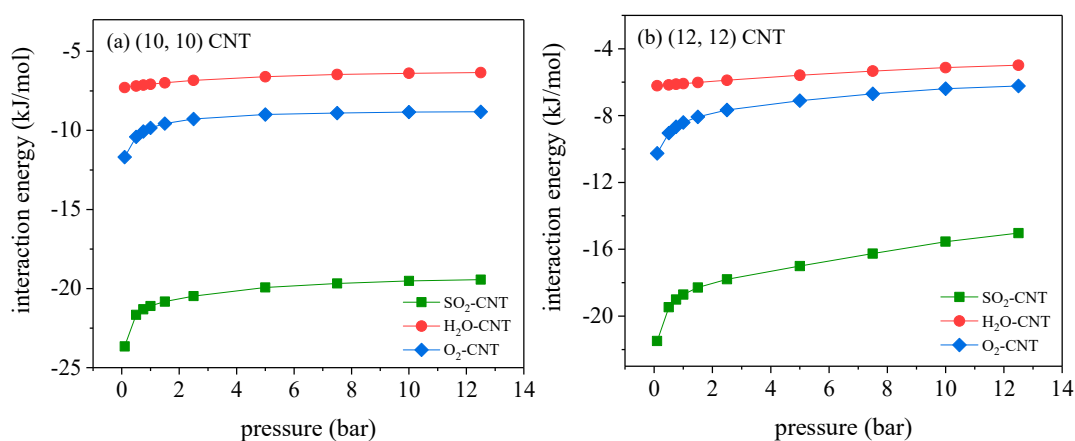

**Figure S4.** Variation of interaction energy of X-CNT which X represents  $SO_2$ ,  $H_2O$  and  $O_2$  with pressure in the (10, 10) (a) and (12, 12) (b) CNTs.
